# Supplementary material for: Understanding host-microbiota interactions in the commercial piglet around weaning
Source: PubMed Central journal article supplement (PMC8648723; doi:10.1038/s41598-021-02754-6), 2021-12-06
Supplement: 41598_2021_2754_MOESM1_ESM.pdf [file 41598_2021_2754_MOESM1_ESM.pdf]

## Understanding host-microbiota interactions in the commercial piglet around weaning.

Saladrigas-García, M.<sup>1</sup>, D'Angelo M.<sup>1</sup>, Ko, H.L.<sup>1</sup>, Nolis, P.<sup>2</sup>, Ramayo-Caldas, Y.<sup>3</sup>, Folch, J.M.<sup>4,5</sup>, Llonch, P.<sup>1</sup>, Solà-Oriol, D.<sup>1</sup>, Pérez J.F.<sup>1</sup>, Martín-Orúe, S.M.<sup>1</sup> \*

<sup>1</sup> Animal Nutrition and Welfare Service (SNIWA), Department of Animal and Food Science, Universitat Autònoma de Barcelona (UAB), 08193 Bellaterra, Spain

<sup>2</sup> Nuclear Magnetic Resonance (SeRMN), Universitat Autònoma de Barcelona (UAB), 08193 Bellaterra, Spain

<sup>3</sup> Animal Breeding and Genetics Program, Institute for Research and Technology in Food and Agriculture (IRTA), Torre Marimon, 08140 Caldes de Montbui, Spain.

<sup>4</sup> Plant and Animal Genomics, Centre for Research in Agricultural Genomics (CRAG), CSIC-IRTA-UAB-UB Consortium, 08193 Bellaterra, Spain.

<sup>5</sup> Department of Animal and Food Science, Universitat Autònoma de Barcelona (UAB), 08193 Bellaterra, Spain.

\* Corresponding author (susana.martin@uab.cat; Tel.: +34-93-581-1504)

## Supplementary information

### Supplementary tables

**Supplementary Table S1.** List of the 52 genes related to intestinal health included in the custom OpenArray plate and functional group to which they were assigned.

| Gene abbreviation | Gene full name                                                         | Functional group                     |
|-------------------|------------------------------------------------------------------------|--------------------------------------|
| OCLN              | Occludin                                                               | Intestinal barrier                   |
| ZO1               | Zonula occludens 1                                                     | Intestinal barrier                   |
| CLDN1             | Claudin-1                                                              | Intestinal barrier                   |
| CLDN4             | Claudin-4                                                              | Intestinal barrier                   |
| CLDN15            | Claudin-15                                                             | Intestinal barrier                   |
| MUC2              | Mucin 2                                                                | Intestinal barrier                   |
| MUC13             | Mucin 13                                                               | Intestinal barrier                   |
| TFF3              | Trefoil factor 3                                                       | Intestinal barrier                   |
| TLR2              | Toll-like receptor 2                                                   | Pattern recognition receptors (PRRs) |
| TLR4              | Toll-like receptor 4                                                   | Pattern recognition receptors (PRRs) |
| IL1 $\beta$       | Interleukin 1 beta                                                     | Immune response                      |
| IL6               | Interleukin 6                                                          | Immune response                      |
| IL8               | Interleukin 8                                                          | Immune response                      |
| IL10              | Interleukin 10                                                         | Immune response                      |
| IL17A             | Interleukin 17                                                         | Immune response                      |
| IL22              | Interleukin 22                                                         | Immune response                      |
| IFN- $\gamma$     | Interferon gamma                                                       | Immune response                      |
| TNF- $\alpha$     | Tumor necrosis factor alpha                                            | Immune response                      |
| TGF- $\beta$ 1    | Transforming growth factor beta 1                                      | Immune response                      |
| CCL20             | Chemokine (C-C motif) ligand 20                                        | Immune response                      |
| CXCL2             | Chemokine (C-X-C motif) ligand 2                                       | Immune response                      |
| IFNGR1            | Interferon gamma receptor 1                                            | Immune response                      |
| REG3G             | Regenerating-islet derived protein 3 gamma                             | Immune response                      |
| PPARGC1 $\alpha$  | Peroxisome proliferative activated receptor gamma, coactivator 1 alpha | Immune response                      |
| FAXDC2            | Fatty acid hydrolase domain containing 2                               | Immune response                      |
| GBP1              | Guanylate binding protein 1                                            | Immune response                      |
| HSP27             | Heat shock protein 27                                                  | Intestinal homeostasis               |
| HSP70             | Heat shock protein 70                                                  | Intestinal homeostasis               |

|           |                                                                                   |                            |
|-----------|-----------------------------------------------------------------------------------|----------------------------|
| GPX2      | Glutathione peroxidase 2                                                          | Digestive enzyme / hormone |
| SOD2      | Superoxide dismutase                                                              | Digestive enzyme / hormone |
| ALPI      | Intestinal alkaline phosphatase                                                   | Digestive enzyme / hormone |
| SI        | Sucrase-isomaltase                                                                | Digestive enzyme / hormone |
| DAO1      | Diamine oxidase                                                                   | Digestive enzyme / hormone |
| HNMT      | Histamine N-methyltransferase                                                     | Digestive enzyme / hormone |
| ANPEP     | Aminopeptidase-N                                                                  | Digestive enzyme / hormone |
| IDO1      | Indoleamine 2,3-dioxygenase                                                       | Digestive enzyme / hormone |
| GCG       | Glucagon                                                                          | Digestive enzyme / hormone |
| CCK       | Cholecystokinin                                                                   | Digestive enzyme / hormone |
| IGF1R     | Insulin-like growth factor 1 receptor                                             | Digestive enzyme / hormone |
| PYY       | Peptide YY                                                                        | Digestive enzyme / hormone |
| SLC5A1    | Solute carrier family 5 (sodium/glucose cotransporter) member 1                   | Nutrient transport         |
| SLC16A1   | Monocarboxylate transporter 1                                                     | Nutrient transport         |
| SLC7A8    | Solute carrier family 7 (amino acid transporter light chain, L System) member 8   | Nutrient transport         |
| SLC15A1   | Solute carrier family 15 (oligopeptide transporter) member 1                      | Nutrient transport         |
| SLC13A1   | Solute carrier family 13 (sodium/sulfate symporters) member 1                     | Nutrient transport         |
| SLC11A2   | Solute carrier family 11 (proton-coupled divalent metal ion transporter) member 2 | Nutrient transport         |
| SLC30A1   | Solute carrier family 30 (zinc transporter) member 1                              | Nutrient transport         |
| SLC39A4   | Solute carrier family 39 (zinc transporter) member 4)                             | Nutrient transport         |
| CRHR1     | Corticotropin releasing hormone receptor 1                                        | Stress indicators          |
| NR3C1-Gra | Glucocorticoid receptor                                                           | Stress indicators          |
| HSD11B1   | Hydroxysteroid (11-beta) dehydrogenase 1                                          | Stress indicators          |
| TBP       | TATA-Box binding protein                                                          | Housekeeping               |



**Supplementary Table S3.** List of bacterial families that significantly correlated to <sup>1</sup>H-NMR buckets ( $|r| \geq 0.37$ ),  $p \leq 0.05$ . The central point of <sup>1</sup>H-NMR buckets is indicated (ppm) and the potential metabolite that majority contributed to the signal in this region.

| Bacterial family           | <sup>1</sup> H-NMR bucket (ppm) | Potential metabolite  | r     | p-value |
|----------------------------|---------------------------------|-----------------------|-------|---------|
| <i>Bacteroidaceae</i>      | 4.06                            | Creatinine            | -0.53 | 0.0049  |
| <i>Bacteroidaceae</i>      | 0.98                            | Isoleucine + Valine   | -0.43 | 0.03    |
| <i>Bacteroidaceae</i>      | 3.06                            | Creatine + Creatinine | -0.40 | 0.04    |
| <i>Bacteroidaceae</i>      | 2.50                            | Glutamate             | -0.40 | 0.04    |
| <i>Bacteroidaceae</i>      | 7.30                            | Phenylalanine         | -0.38 | 0.05    |
| <i>Campylobacteraceae</i>  | 1.94                            | Acetate               | 0.65  | 0.00028 |
| <i>Campylobacteraceae</i>  | 1.62                            | Adipate               | 0.42  | 0.03    |
| <i>Campylobacteraceae</i>  | 0.90                            | VLDL <sup>a</sup>     | 0.40  | 0.04    |
| <i>Campylobacteraceae</i>  | 2.26                            | Valine                | 0.38  | 0.05    |
| <i>Campylobacteraceae</i>  | 1.14                            | 3-hydroxybutyrate     | 0.38  | 0.05    |
| <i>Campylobacteraceae</i>  | 3.06                            | Creatine + Creatinine | 0.37  | 0.05    |
| <i>Campylobacteraceae</i>  | 2.38                            | Pyruvate              | -0.43 | 0.02    |
| <i>Clostridiaceae</i>      | 1.06                            | Isoleucine            | 0.40  | 0.04    |
| <i>Clostridiaceae</i>      | 3.54                            | Glucose               | 0.38  | 0.05    |
| <i>Coriobacteriaceae</i>   | 3.54                            | Glucose               | 0.55  | 0.0029  |
| <i>Coriobacteriaceae</i>   | 3.90                            | Glucose + AA          | 0.42  | 0.03    |
| <i>Coriobacteriaceae</i>   | 1.14                            | 3-hydroxybutyrate     | 0.40  | 0.04    |
| <i>Coriobacteriaceae</i>   | 5.26                            | Unsaturated lipids    | -0.39 | 0.05    |
| <i>Desulfovibrionaceae</i> | 4.06                            | Creatinine            | 0.48  | 0.01    |
| <i>Desulfovibrionaceae</i> | 7.38                            | Phenylalanine         | 0.41  | 0.03    |
| <i>Desulfovibrionaceae</i> | 3.66                            | Ethanol + Isoleucine  | 0.37  | 0.05    |
| <i>Enterobacteriaceae</i>  | 3.86                            | Glucose + AA          | -0.48 | 0.01    |
| <i>Enterobacteriaceae</i>  | 3.54                            | Glucose               | -0.40 | 0.04    |
| <i>Erysipelotrichaceae</i> | 3.58                            | Glucose + AA          | 0.57  | 0.0021  |
| <i>Erysipelotrichaceae</i> | 2.50                            | Glutamate             | 0.49  | 0.01    |
| <i>Erysipelotrichaceae</i> | 2.14                            | Glutamine             | 0.49  | 0.01    |
| <i>Erysipelotrichaceae</i> | 7.34                            | Phenylalanine         | 0.47  | 0.01    |
| <i>Erysipelotrichaceae</i> | 1.02                            | Isoleucine + Valine   | 0.43  | 0.03    |
| <i>Erysipelotrichaceae</i> | 1.06                            | Isoleucine            | 0.42  | 0.03    |
| <i>Erysipelotrichaceae</i> | 7.26                            | Tyrosine              | 0.40  | 0.04    |

|                            |      |                             |       |         |
|----------------------------|------|-----------------------------|-------|---------|
| <i>Erysipelotrichaceae</i> | 1.94 | Acetate                     | 0.38  | 0.05    |
| <i>Lachnospiraceae</i>     | 3.54 | Glucose                     | 0.39  | 0.04    |
| <i>Lactobacillaceae</i>    | 2.10 | O-acetylglucoprotein        | -0.40 | 0.04    |
| <i>Odoribacteraceae</i>    | 2.38 | Pyruvate                    | -0.53 | 0.0042  |
| <i>Odoribacteraceae</i>    | 3.78 | Glucose + AA                | -0.50 | 0.01    |
| <i>Odoribacteraceae</i>    | 2.50 | Glutamate                   | -0.46 | 0.02    |
| <i>Odoribacteraceae</i>    | 4.14 | Lactate                     | -0.44 | 0.02    |
| <i>Odoribacteraceae</i>    | 4.06 | Creatinine                  | -0.41 | 0.04    |
| <i>Odoribacteraceae</i>    | 3.26 | Glucose + TMAO <sup>b</sup> | -0.40 | 0.04    |
| <i>Odoribacteraceae</i>    | 2.14 | Glutamine                   | -0.39 | 0.04    |
| <i>Odoribacteraceae</i>    | 2.10 | O-acetylglucoprotein        | -0.39 | 0.05    |
| <i>Paraprevotellaceae</i>  | 1.14 | 3-hydroxybutyrate           | 0.60  | 0.00098 |
| <i>Paraprevotellaceae</i>  | 3.66 | Ethanol + Isoleucine        | 0.54  | 0.0038  |
| <i>Paraprevotellaceae</i>  | 1.10 | Isoleucine                  | 0.49  | 0.01    |
| <i>Paraprevotellaceae</i>  | 3.94 | Creatine                    | 0.44  | 0.02    |
| <i>Porphyromonadaceae</i>  | 2.10 | O-acetylglucoprotein        | 0.41  | 0.03    |
| <i>Porphyromonadaceae</i>  | 7.26 | Tyrosine                    | 0.39  | 0.04    |
| <i>Porphyromonadaceae</i>  | 1.10 | Isoleucine                  | 0.39  | 0.04    |
| <i>Porphyromonadaceae</i>  | 7.30 | Phenylalanine               | 0.39  | 0.05    |
| <i>Streptococcaceae</i>    | 1.50 | Alanine                     | 0.48  | 0.01    |
| <i>Streptococcaceae</i>    | 2.26 | Valine                      | -0.52 | 0.01    |
| <i>Streptococcaceae</i>    | 0.90 | VLDL <sup>a</sup>           | -0.45 | 0.02    |
| <i>Streptococcaceae</i>    | 1.58 | Adipate                     | -0.42 | 0.03    |
| <i>Streptococcaceae</i>    | 3.66 | Ethanol + Isoleucine        | -0.38 | 0.05    |
| <i>S24-7</i>               | 7.38 | Phenylalanine               | 0.42  | 0.03    |
| <i>Victivallaceae</i>      | 3.86 | Glucose + AA                | -0.63 | 0.00041 |
| <i>Victivallaceae</i>      | 4.06 | Creatinine                  | -0.59 | 0.0011  |
| <i>Victivallaceae</i>      | 3.54 | Glucose                     | -0.54 | 0.0035  |
| <i>Victivallaceae</i>      | 3.06 | Creatine + Creatinine       | -0.50 | 0.01    |
| <i>Victivallaceae</i>      | 3.26 | Glucose + TMAO <sup>b</sup> | -0.50 | 0.01    |
| <i>Victivallaceae</i>      | 2.50 | Glutamate                   | -0.42 | 0.03    |
| <i>Victivallaceae</i>      | 3.94 | Creatine                    | -0.40 | 0.04    |
| <i>Victivallaceae</i>      | 2.10 | O-acetylglucoprotein        | -0.40 | 0.04    |
| <i>Victivallaceae</i>      | 2.38 | Pyruvate                    | -0.39 | 0.05    |

<sup>a</sup>VLDL, very low density lipoprotein; <sup>b</sup>TMAO, trimethylamine-N-oxide.

**Supplementary Table S4.** Estimated chemical composition of diets, ingredients and additives included.

| Lactating diet                                                                                                                                                                                                                                                                                                                                                                                                                                                           |      | Pre-starter diet*                                                                                                                                                                                                                                                                                                                                                                                                                                                                                                |      |
|--------------------------------------------------------------------------------------------------------------------------------------------------------------------------------------------------------------------------------------------------------------------------------------------------------------------------------------------------------------------------------------------------------------------------------------------------------------------------|------|------------------------------------------------------------------------------------------------------------------------------------------------------------------------------------------------------------------------------------------------------------------------------------------------------------------------------------------------------------------------------------------------------------------------------------------------------------------------------------------------------------------|------|
| Net Energy (Kcal/kg)                                                                                                                                                                                                                                                                                                                                                                                                                                                     | 2450 | Net Energy (Kcal/kg)                                                                                                                                                                                                                                                                                                                                                                                                                                                                                             | 2480 |
| Crude protein (%)                                                                                                                                                                                                                                                                                                                                                                                                                                                        | 15.5 | Crude protein (%)                                                                                                                                                                                                                                                                                                                                                                                                                                                                                                | 16.5 |
| Crude Fat (%)                                                                                                                                                                                                                                                                                                                                                                                                                                                            | 4.5  | Crude Fat (%)                                                                                                                                                                                                                                                                                                                                                                                                                                                                                                    | 4.8  |
| Crude Fiber (%)                                                                                                                                                                                                                                                                                                                                                                                                                                                          | 5.7  | Crude Fiber (%)                                                                                                                                                                                                                                                                                                                                                                                                                                                                                                  | 4.1  |
| Lys (%)                                                                                                                                                                                                                                                                                                                                                                                                                                                                  | 1.02 | Lys (%)                                                                                                                                                                                                                                                                                                                                                                                                                                                                                                          | 1.33 |
| Ash (%)                                                                                                                                                                                                                                                                                                                                                                                                                                                                  | 6.70 | Ash (%)                                                                                                                                                                                                                                                                                                                                                                                                                                                                                                          | 5.40 |
| Ca (%)                                                                                                                                                                                                                                                                                                                                                                                                                                                                   | 1.05 | Ca (%)                                                                                                                                                                                                                                                                                                                                                                                                                                                                                                           | 0.55 |
| P (%)                                                                                                                                                                                                                                                                                                                                                                                                                                                                    | 0.60 | P (%)                                                                                                                                                                                                                                                                                                                                                                                                                                                                                                            | 0.61 |
| <b>Main ingredients:</b> Barley, Corn, Wheat middlings, Soybean meal, Rapeseed meal, Corn flakes, Lard, Cane molasses, Beet pulp, Sunflower meal, Calcium carbonate, L-Lysine, Sodium bicarbonate, Monocalcium phosphate, Sodium chloride.                                                                                                                                                                                                                               |      | <b>Main ingredients:</b> Wheat, Barley, Corn Flakes, Oats, Corn, Fish meal, Wheat middlings, Porcine plasma, Soy protein concentrate, Sunflower meal, Soy lecithin, Beet pulp, L-Lysine, L-Valine, Calcium carbonate, Monocalcium phosphate, Sodium Chloride, Choline Chloride.                                                                                                                                                                                                                                  |      |
| <b>Additives:</b> Vitamin A (10,000 IU/kg), Vitamin D3 (100 IU/kg); Fe (as FeCO <sub>3</sub> ; 100 mg/kg), Cu (as sulfate pentahydrate; 100 mg/kg); Zn (as ZnO; 100 mg/kg); Se (as sodium selenite, 0.2 mg/kg; and selenomethionine, 0.2 mg/kg); Iodine (as potassium iodide; 0.7 mg/kg); Mn (as MnO <sub>2</sub> ; 50 mg/kg); 6-Phytase (500 PPU/kg); Butylhydroxytoluene or BHT (0.3 mg/kg); and <i>Saccharomyces cerevisiae</i> NCYC Sc47 (1x10 <sup>9</sup> UFC/kg). |      | <b>Additives:</b> Vitamin A (6,000 IU/kg), Vitamin D3 (1,000 IU/kg); Fe (as FeCO <sub>3</sub> ; 31 mg/kg), Cu (as amino acid chelate; 75 mg/kg); Zn (as ZnO; 50 mg/kg); Se (as sodium selenite, 0.08 mg/kg; and selenite CNCM I-3060, 0.008 mg/kg); Iodine (as potassium iodide; 0.4 mg/kg); Mn (as MnO <sub>2</sub> ; 25 mg/kg); 6-Phytase (0.63 PPU/kg); Endo-1,4-β-xylanase (3,000 EPU/kg); Butylhydroxytoluene or BHT (0.3 mg/kg); and <i>Saccharomyces cerevisiae</i> NCYC Sc47 (1x10 <sup>9</sup> UFC/kg). |      |

\* Pre-starter diet was also offered as creep-feeding.

## Supplementary figures

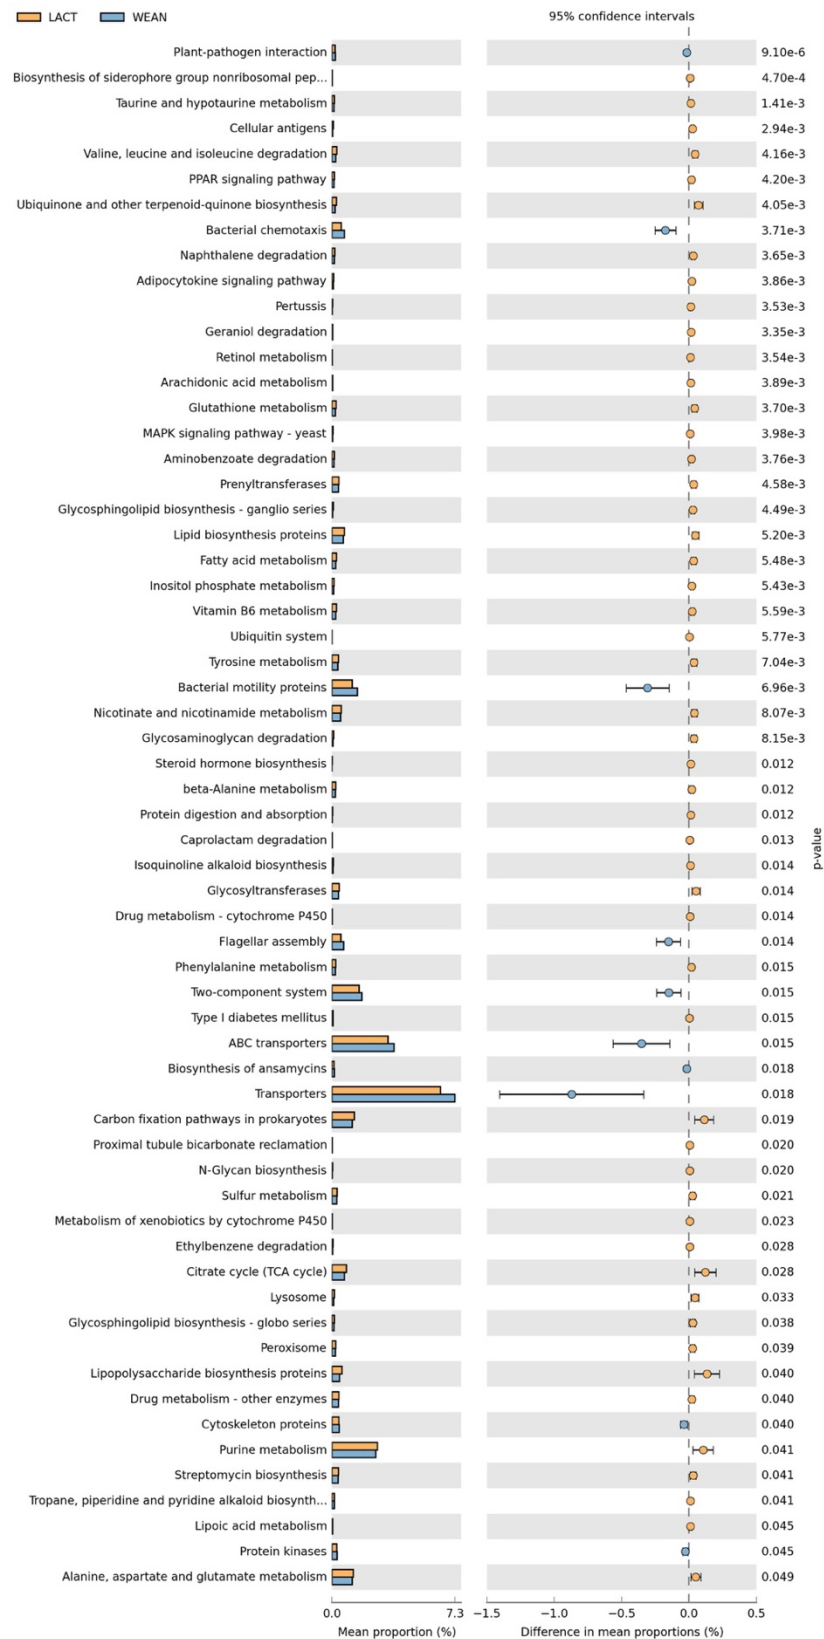

**Supplementary Figure S1.** Significant differing caecal microbiota pathways between suckling and weaned piglets (KEGG level 3). All sequence reads were used to predict functions against the KEGG database by means of PICRUSt bioinformatics software package. Figure created with the software STAMP.



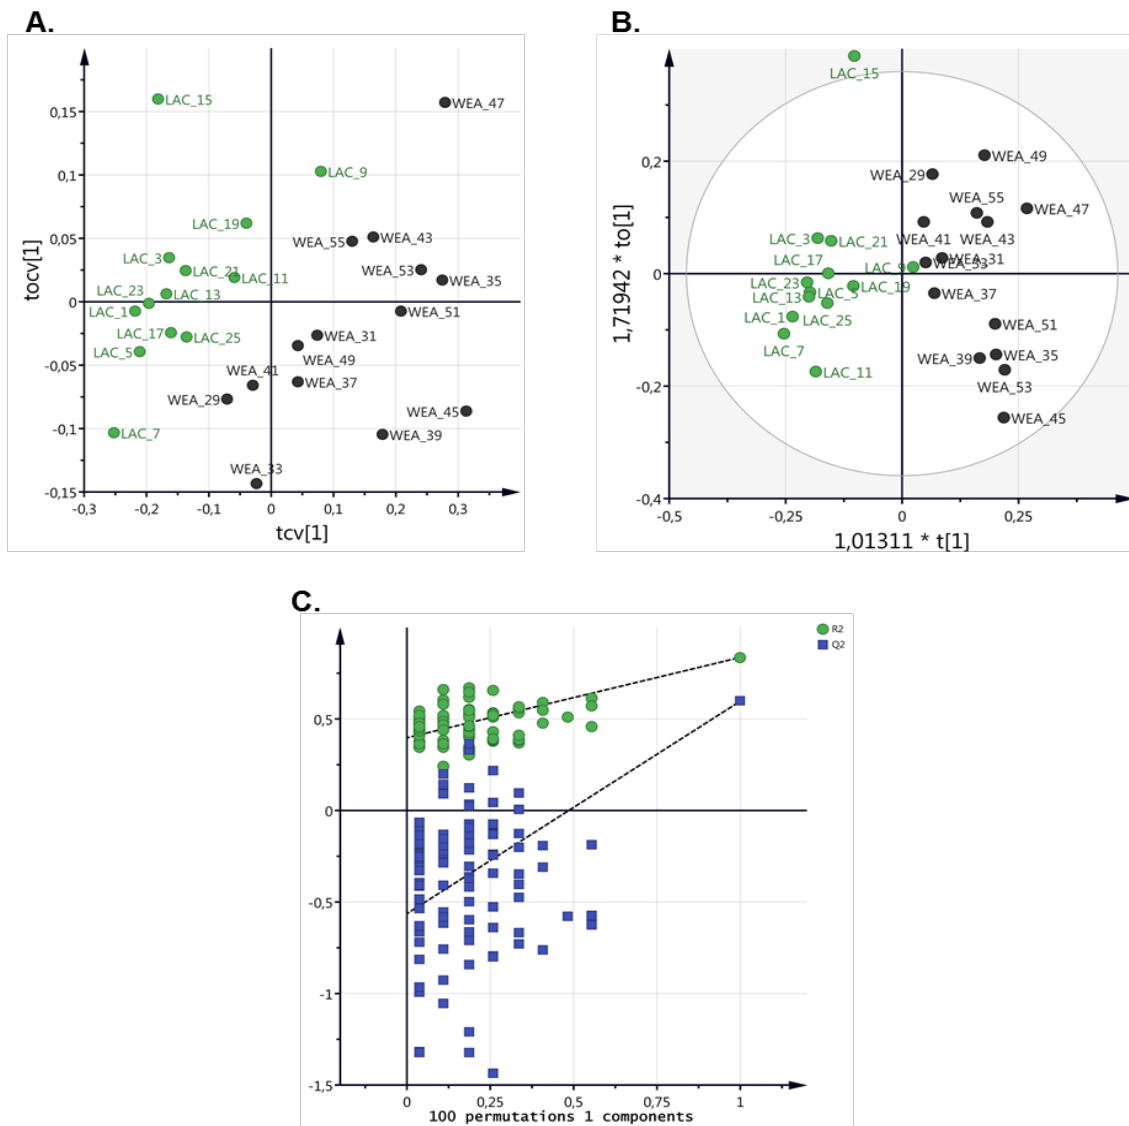

**Supplementary Figure S2.** Validation of the OPLS-DA model between nursing piglets and after weaning piglets. Cross validation plot (A) of the OPLS-DA model. OPLS-DA plot (B) derived from  $^1H$ -NMR serum spectra of nursing piglets (green) and weaned piglets (black). 100 random permutation test plot (C) relative to OPLS-DA model including all samples, where the vertical axis corresponds to  $R^2$  (green circles) and  $Q^2$  (blue squares) values for the model and the horizontal axis corresponds to the correlation coefficient between the original Y and the permuted Y.

The OPLS-DA constructed to discriminate between nursing piglets and after weaning piglets was confirmed by cross validation probe. Comparing both plots, while there was shifting of same spots along the orthogonal axis, the 88.9 % of the spots have the same position respect to the first component, indicating that the OPLS-DA model is devoid of influential observations and it is stable to the inclusion or exclusion of all the different observations. The permutation test plot shows the correlation coefficient between the original y-variable and the permuted y-variable on the x-axis versus the cumulative  $R^2$  and  $Q^2$  on the Y-axis and plots the regression line, the intercept is a measure of the overfitting. The plot of permutation test (100 times) (Supplementary Figure S1C) performed for nursing and after weaned piglets shows that the new parameters ( $R^2=0.40$  and  $Q^2= -0.56$ ) were lower than the original values indicating a lack of over-fitting.

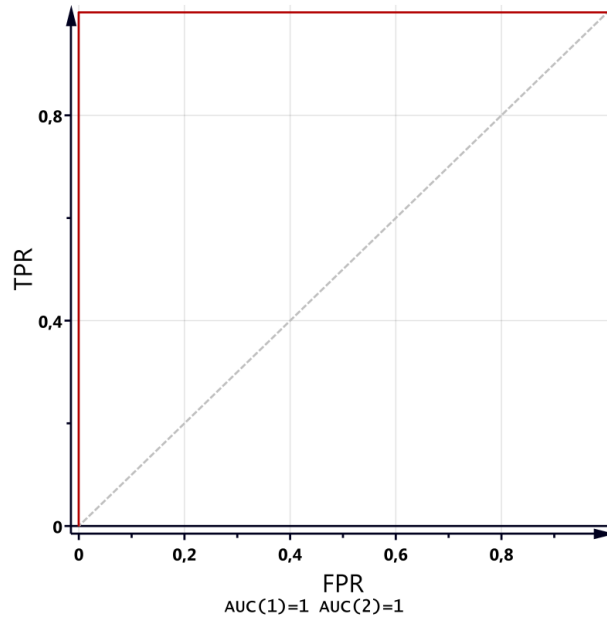

**Supplementary Figure S3.** Receiver operating characteristic (ROC) plot for the OPLS-DA model between nursing and weaned piglets. The ROC plot displays the TPR for nursing group classification (blue) or for weaned group classification (red) by the constructed model plotted against the corresponding FPR at various threshold settings of the criterion parameter (YPredPS). Both curves have an AUC of the ROC plot of 1.0 indicating high sensitivity and specificity and, in consequence, a high prediction power of the model.

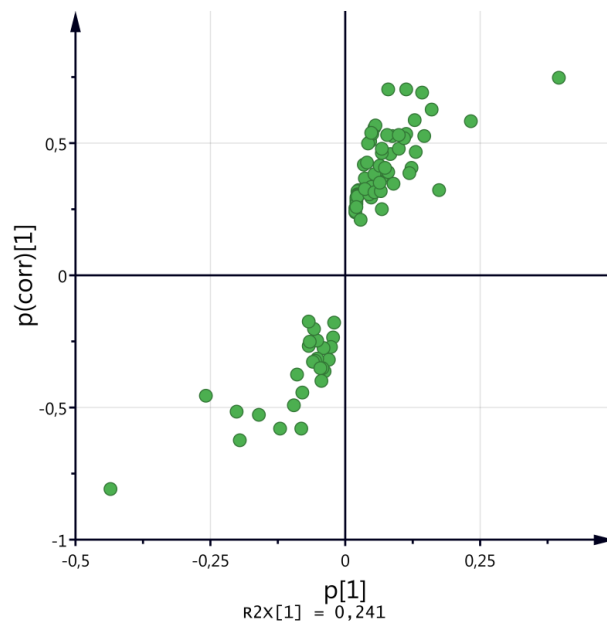

**Supplementary Figure S4.** S-plot corresponding to OPLS-DA model between nursing and weaned piglets. The covariance value for each variable included is represented on the horizontal axis in the model. The vertical axis represents the correlation values obtained with respect to the dependent variable. The points at both ends of the S-plot curve indicate regions that have a strong discriminant power on the group separation.
